# Supplementary material
Source: HighWire-hosted journal article supplement (https://rc.rcjournal.com/highwire/filestream/19795/field_highwire_adjunct_files/1/suppl_2.pdf)
Supplement: suppl_2.pdf [file suppl_2.pdf]

# COVID-19 Intubation Checklist

## Pre-intubation huddle performed PRIOR to entering room

| Task                                                                                                                                                                                                                                                                     | Task Completed             |
|--------------------------------------------------------------------------------------------------------------------------------------------------------------------------------------------------------------------------------------------------------------------------|----------------------------|
| Airway cart present outside room with scalpel and small ETT/trach                                                                                                                                                                                                        | <input type="checkbox"/> • |
| Equipment checked and present:                                                                                                                                                                                                                                           | <input type="checkbox"/> • |
| <ul style="list-style-type: none"> <li>Both videolaryngoscope and DL blades checked and removed from stand and placed in ziplock bag with ultrasound probe cover</li> </ul>                                                                                              | <input type="checkbox"/> • |
| <ul style="list-style-type: none"> <li>ETT with stylet with balloon checked</li> </ul>                                                                                                                                                                                   | <input type="checkbox"/> • |
| <ul style="list-style-type: none"> <li>ETCO2</li> </ul>                                                                                                                                                                                                                  | <input type="checkbox"/> • |
| <ul style="list-style-type: none"> <li>Oropharyngeal airway or nasopharyngeal airway</li> </ul>                                                                                                                                                                          | <input type="checkbox"/> • |
| <ul style="list-style-type: none"> <li>Bougie</li> </ul>                                                                                                                                                                                                                 | <input type="checkbox"/> • |
| <ul style="list-style-type: none"> <li>Viral filter for ambu bag and ventilator</li> </ul>                                                                                                                                                                               | <input type="checkbox"/> • |
| Medications (including dose):                                                                                                                                                                                                                                            | <input type="checkbox"/> • |
| <ul style="list-style-type: none"> <li>Induction, paralytic, maintenance sedation, push dose vasopressor and/or IV vasopressor infusion and flushes</li> </ul>                                                                                                           |                            |
| Appropriate IV access and IV pump and channels available                                                                                                                                                                                                                 | <input type="checkbox"/> • |
| Check that all participants entering the room have appropriate PPE:                                                                                                                                                                                                      | <input type="checkbox"/> • |
| <ul style="list-style-type: none"> <li>Gown, gloves (airway operator to double glove), N95/PAPR, face shield, head cover</li> </ul>                                                                                                                                      |                            |
| Briefing of plan with full attention of everyone in the room:                                                                                                                                                                                                            | <input type="checkbox"/> • |
| <ul style="list-style-type: none"> <li>Plan for medications: medications inside vs outside room, rescue method, and anticipated complications (difficult airway, hypoxemia, hypotension)</li> <li>Discuss method of communication from inside to outside room</li> </ul> |                            |
| Role Designation (participants in room):                                                                                                                                                                                                                                 | <input type="checkbox"/> • |
| <ul style="list-style-type: none"> <li>Respiratory therapist - Ambu bag, ETCO2, oral/nasal airway, ETT</li> <li>Nurse #1 – medications and vasopressors, auscultate tube placement</li> <li>Nurse #2 (VCC nurse) – observing monitor</li> </ul>                          |                            |
| Role Designation (outside room):                                                                                                                                                                                                                                         | <input type="checkbox"/> • |
| <ul style="list-style-type: none"> <li>Runner for extra supplies</li> <li>2<sup>nd</sup> airway operator partially donned with exception of N95/face shield</li> </ul>                                                                                                   |                            |

## After Entering the Room

| Task                                                                        | Task Completed             |
|-----------------------------------------------------------------------------|----------------------------|
| Blood pressure to cycle every 3 minutes                                     | <input type="checkbox"/> • |
| Pulse oximetry and BP cuff on opposite arms                                 | <input type="checkbox"/> • |
| Working suction                                                             | <input type="checkbox"/> • |
| Ambu bag with viral filter and ETCO2 in place and connected to oxygen       | <input type="checkbox"/> • |
| Bedside table near door for runner to place supplies, verify door is closed | <input type="checkbox"/> • |
